# Supplementary material for: The antioxidant function of the p53 tumor suppressor
Source: Springer Nature journal article supplement (doi:10.1038/nm1320), 2005-11-13
Supplement: 41591_2005_BFnm1320_MOESM1_ESM.pdf [file 41591_2005_BFnm1320_MOESM1_ESM.pdf]

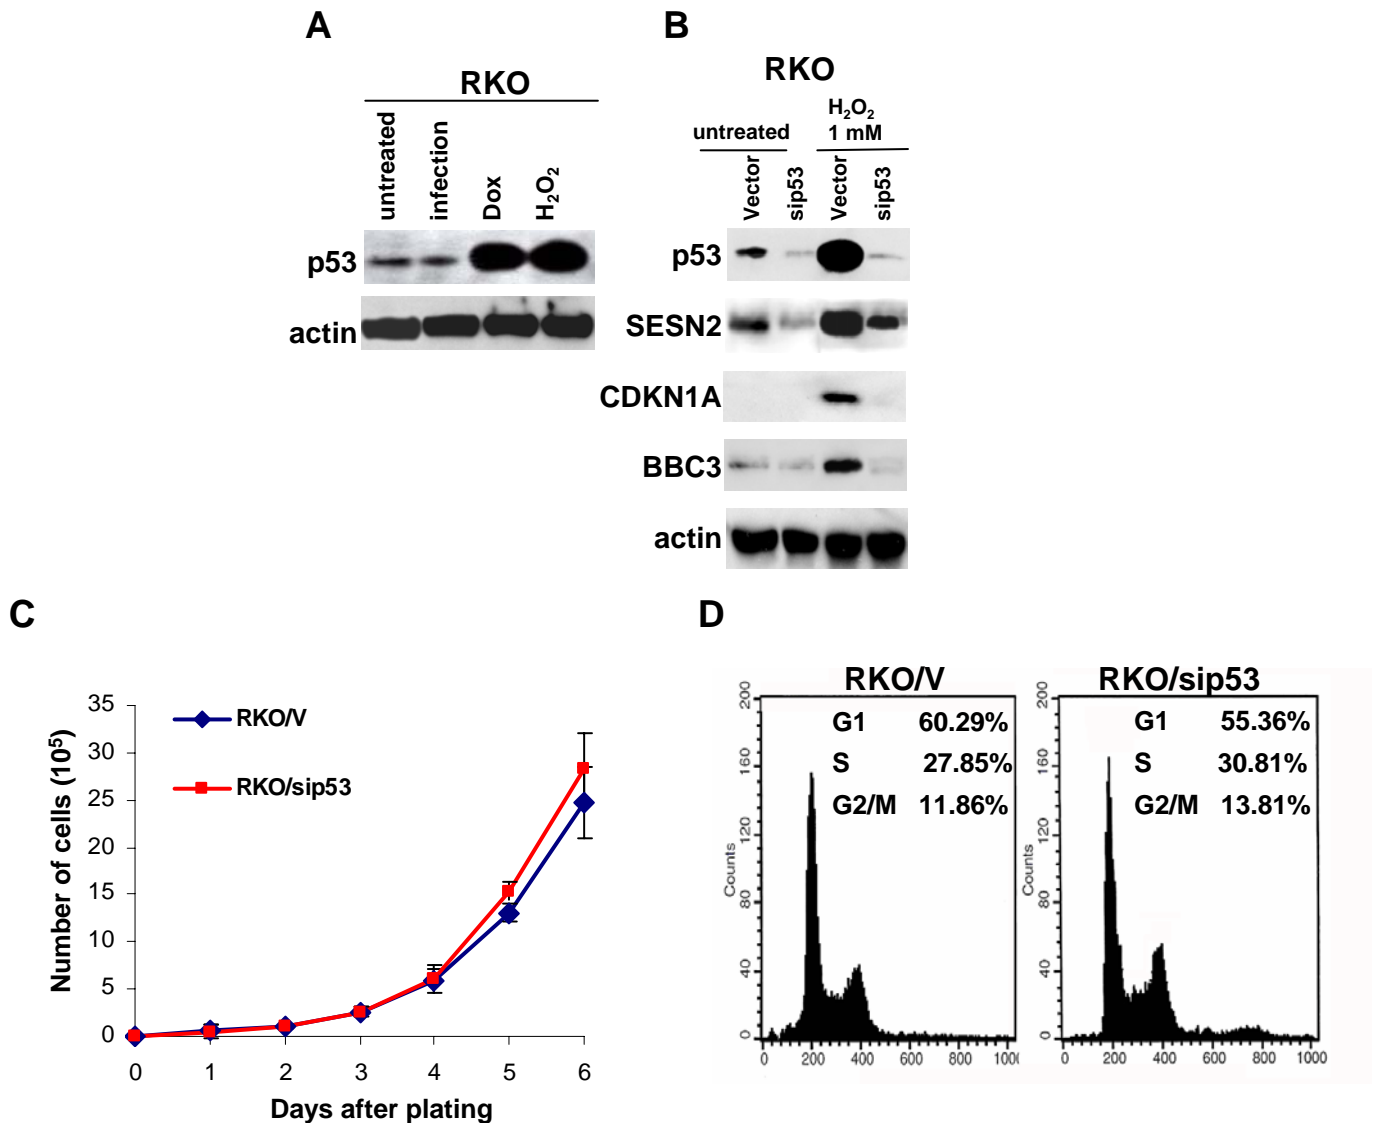

**Suppl. Fig 1. Characterization of RKO cells with inhibited expression of p53.**

**a**, RKO cells were treated with control vector viral stock, doxorubicin (Dox, 0.5  $\mu$ g/ml) or H<sub>2</sub>O<sub>2</sub> (1mM) for 24 hours. p53 protein levels were detected by western blotting with DO-1 monoclonal antibody (Santa Cruz Biotechnology); **b**, RKO cells were infected with control vector or sip53. 72 hours after infection cells were treated with H<sub>2</sub>O<sub>2</sub> (1mM) for 24 hours. Expression of p53 and p53-mediated proteins was detected by Western blotting using anti-p53 (DO-1 monoclonal, Santa Cruz Biotechnology), anti-Hi95 (Sesn2) polyclonal (Quark Biotech), anti-p21 (CDKN1A) monoclonal, (F-5, Santa Cruz Biotechnology) and anti-Puma (BBC3) rabbit polyclonal, (AbCam) antibodies; **c**, Growth curves of RKO/V and RKO/sip53 cells. P=0.95 by Student's t test. **d**, Cell cycle distribution of RKO/V and RKO/sip53 was analyzed 6 days after infection with corresponding viral stocks.
