# Supplementary material for: The antioxidant function of the p53 tumor suppressor
Source: Springer Nature journal article supplement (doi:10.1038/nm1320), 2005-11-13
Supplement: 41591_2005_BFnm1320_MOESM2_ESM.pdf [file 41591_2005_BFnm1320_MOESM2_ESM.pdf]

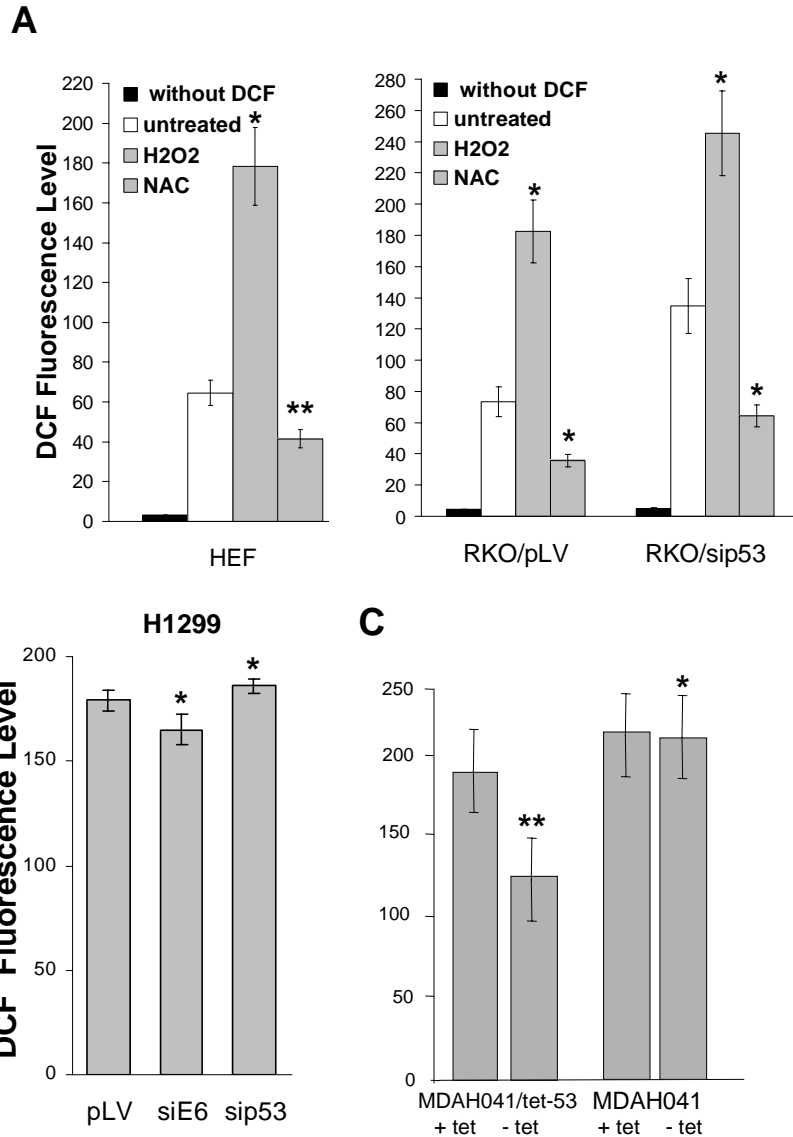

**Suppl. Fig 2. Effect of deficiency in p53 on intracellular ROS level.**

**a**, FACS-analysis of DCF-stained HEFs, RKO/pLV and RKO/sip53 cells treated with H<sub>2</sub>O<sub>2</sub> (1mM, 4 hours) or NAC (5mM, 4 hours). ROS levels are expressed as the mean  $\pm$  sem intensity of cell fluorescence. \*P<0.03 and \*\*P=0.05 compared to the corresponding untreated cells by Student's t test; **b**, Intracellular ROS levels in p53-negative human H1299 cells expressing control vector pLV, p53 siRNA or non-specific HPV18 E6 siRNA measured by DCF staining and FACS-analysis. ROS levels are expressed as the mean  $\pm$  sem intensity of cell fluorescence. \*P=0,98 compared to the cells with control vector by Student's t test; **c**, Intracellular ROS levels of MDAH041 with tetracycline-regulated expression of p53 (TR9-7). To induce p53 expression MDAH041/tet-p53 cells were incubated without tetracycline for 4 days. ROS levels were analyzed by DCF staining and FACS-analysis and expressed as the mean  $\pm$  sem intensity of cell fluorescence. \*P=0,97 and \*\*P=0.05 compared to the cells grown in the presence of tetracycline by Student's t test.
