# Supplementary material for: The antioxidant function of the p53 tumor suppressor
Source: Springer Nature journal article supplement (doi:10.1038/nm1320), 2005-11-13
Supplement: 41591_2005_BFnm1320_MOESM4_ESM.pdf [file 41591_2005_BFnm1320_MOESM4_ESM.pdf]

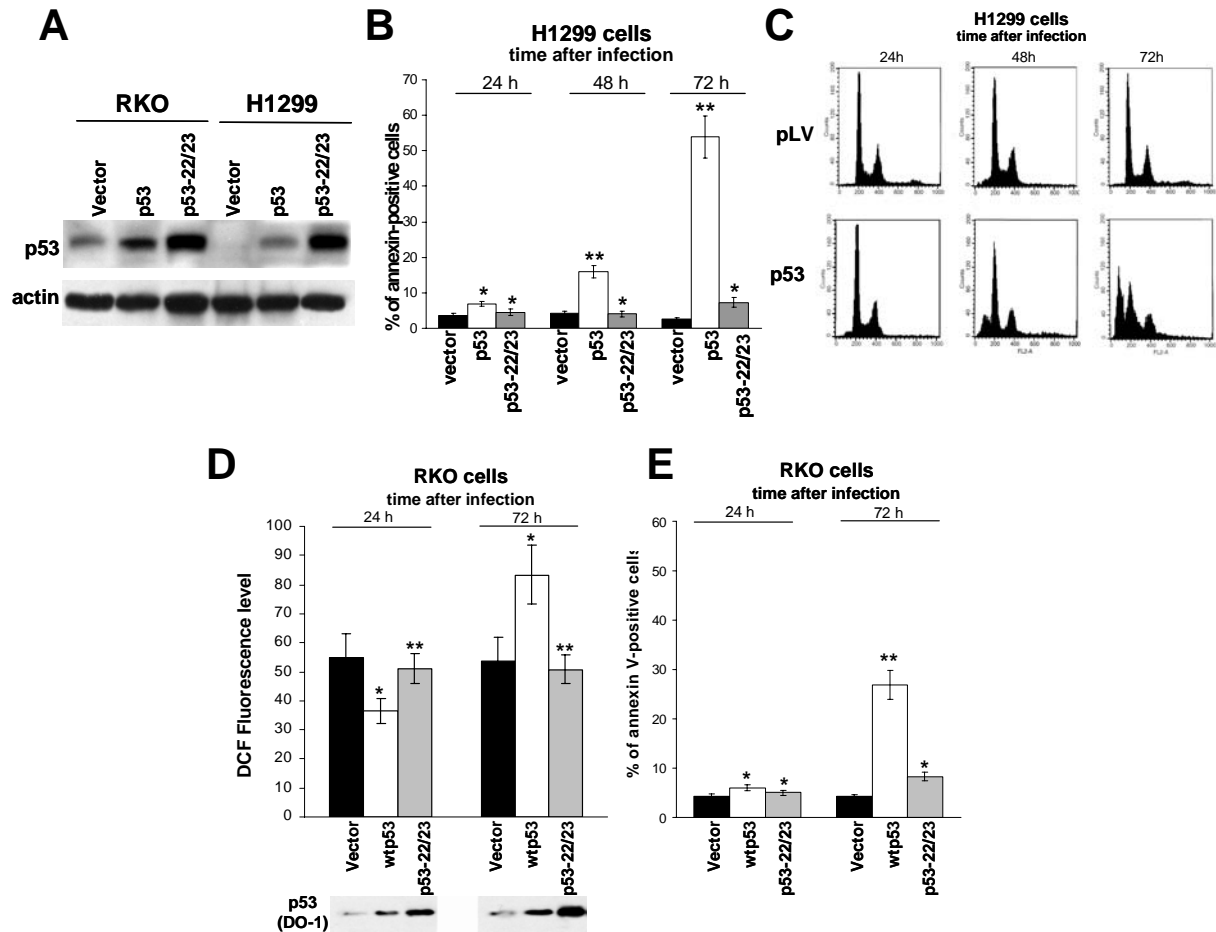

**Suppl. Fig 4. (a,b,c) Effect of p53 expression on cell cycle and apoptosis in H1299 cells.** **a**, p53 expression in RKO and H1299 cells was detected 24 hours after infection. Western blotting was performed with DO-1 monoclonal antibody (Santa Cruz Biotech). **b**, Apoptosis level in H1299 cells after expression of wild-type p53 or transcriptionally-inactive p53 mutant Glu22Leu,Trp23Ser (p53-22/23) detected by Annexin V staining. \* $P=0.97$  and \*\* $P<0.05$  compared to the cells with control vector by Student's t test. **c**, Cell cycle distribution of H1299 cells after infection with empty vector or p53 expressing vector.

**(d,e) Effect of p53 expression on cell cycle and apoptosis in H1299 cells.** **a**, p53 expression in RKO and H1299 cells was detected 24 hours after infection. Western blotting was performed with DO-1 monoclonal antibody (Santa Cruz Biotech). **b**, Intracellular ROS levels were measured by DCF staining and FACS-analysis in RKO cells after lentiviral infection with wild-type p53 or p53-22/23 mutant. \* $P=0.97$  and \*\* $P<0.05$  compared to the cells with control vector by Student's t test. **c**, Apoptosis level in H1299 cells after expression of wild-type p53 or transcriptionally-inactive p53 mutant Q22L/W23S (p53-22/23) detected by Annexin V staining. \* $P=0.97$  and \*\* $P<0.05$  compared to the cells with control vector by Student's t test.
