# Supplementary material for: The antioxidant function of the p53 tumor suppressor
Source: Springer Nature journal article supplement (doi:10.1038/nm1320), 2005-11-13
Supplement: 41591_2005_BFnm1320_MOESM5_ESM.pdf [file 41591_2005_BFnm1320_MOESM5_ESM.pdf]

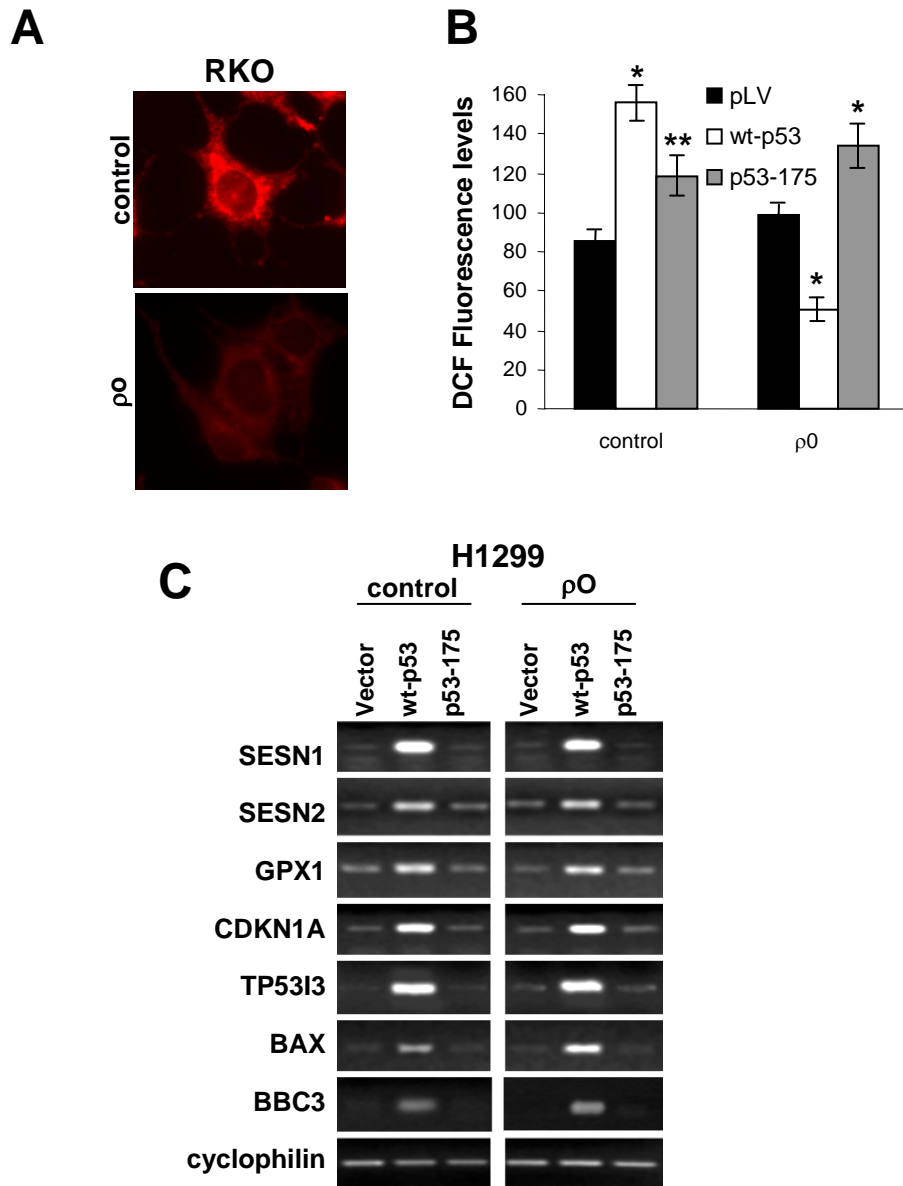

**Suppl. Fig 5. Effect of p53 overexpression on intracellular ROS levels in control and mitochondrial DNA-deficient cells ( $\rho 0$ ).**

**a**, Mitochondria in control and mitochondrial DNA-deficient ( $\rho 0$ ) RKO cells were stained with MitoTracker. **b**, Intracellular ROS levels measured by DCF staining and FACS-analysis in control and  $\rho 0$  RKO cells after overexpression of exogenous wild-type p53 or His175 p53 mutant. ROS levels are expressed as the mean  $\pm$  sem intensity of cell fluorescence. \* $P < 0.03$  and \*\* $P = 0.05$  compared to the corresponding untreated cells by Student's t test; **c**, RT-PCR analysis of expression of different p53 target genes after overexpression of wild-type p53 or the His175 p53 mutant into control or  $\rho 0$  H1299 cells.
