# Supplementary material for: The antioxidant function of the p53 tumor suppressor
Source: Springer Nature journal article supplement (doi:10.1038/nm1320), 2005-11-13
Supplement: 41591_2005_BFnm1320_MOESM6_ESM.pdf [file 41591_2005_BFnm1320_MOESM6_ESM.pdf]

**A**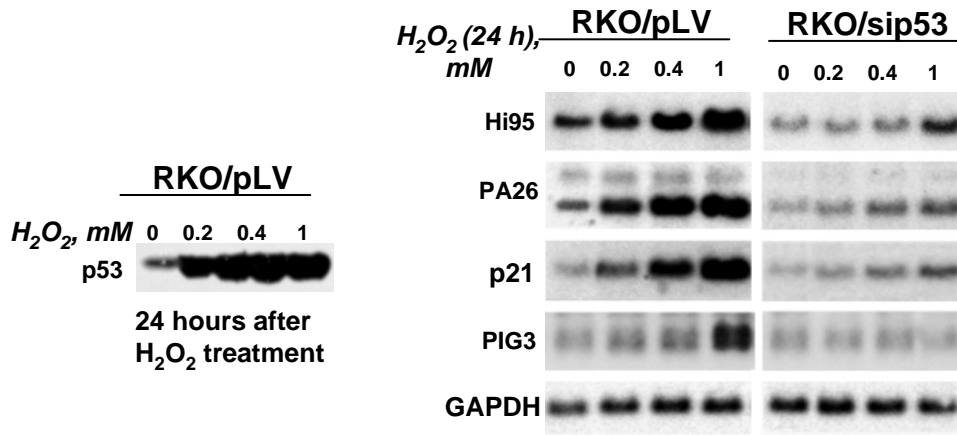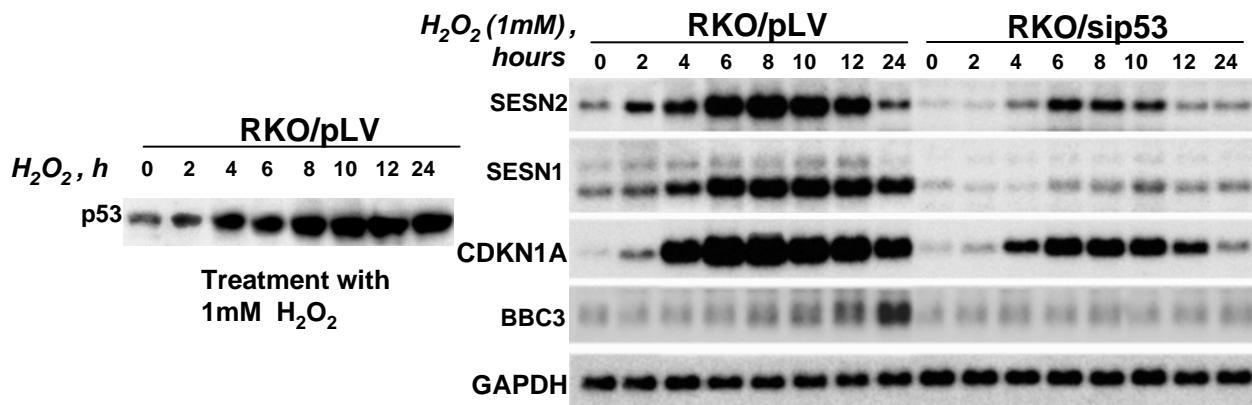**B**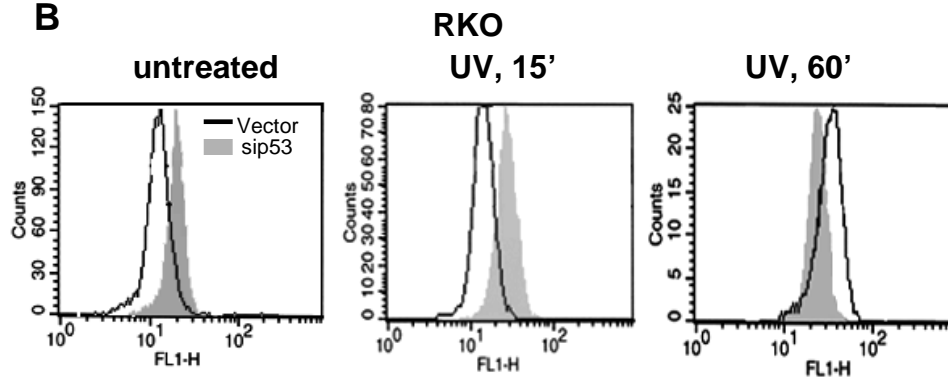**Suppl. Fig 6.**

a, Concentration dependence and kinetics of endogenous p53 expression 24 hours after  $H_2O_2$  treatment as detected by Western blotting using DO-1 monoclonal antibody (Santa Cruz Biotech). Induction of p53-responsive genes in control and sip53 expressing RKO cells 24 hours following treatment with various doses of  $H_2O_2$  and at different time intervals following treatment with 1 mM of  $H_2O_2$ , as detected by Northern analysis; b, Intracellular ROS levels in untreated and UV-irradiated (10 hours) RKO/pLV and RKO/sip53 cells detected by DCF staining and FACS-analysis.
