# Supplementary material for: The antioxidant function of the p53 tumor suppressor
Source: Springer Nature journal article supplement (doi:10.1038/nm1320), 2005-11-13
Supplement: 41591_2005_BFnm1320_MOESM8_ESM.pdf [file 41591_2005_BFnm1320_MOESM8_ESM.pdf]

**A**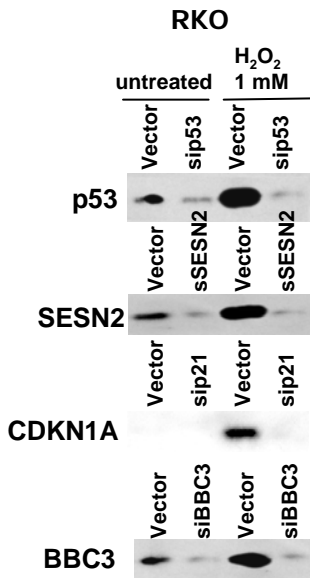**B**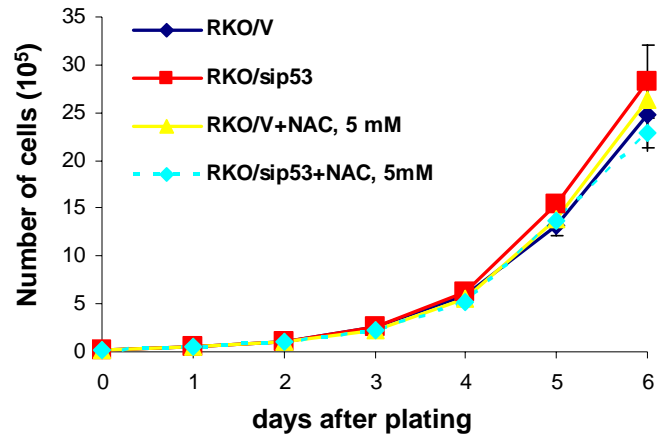

**Suppl. Fig 8. a**, Inhibition of different p53 target genes by corresponding siRNAs. Western blotting was performed using anti-p53 (DO-1 monoclonal, Santa Cruz Biotech), anti-Hi95 (polyclonal, Quark Biotech), anti-p21 (F-5 monoclonal, Santa Cruz Biotech) and anti-PUMA (rabbit polyclonal, Abcam) antibodies. **b**, Growth curves of RKO/V and RKO/sip53 cells untreated or treated with NAC (5 mM).  $P > 0.95$  compared to the correspondent untreated cells by Student's t test.
